# Supplementary material for: Transcriptome Analyses Provide Insights into the Aggressive Behavior toward Conspecific and Heterospecific in Thitarodes xiaojinensis (Lepidoptera: Hepialidae)
Source: MDPI journal article supplement (doi:10.3390/insects12070577), 2021-06-25
Supplement: s1 [file s1]

**Figure S1: Insect combinations of the assays.** Including L2vsL2 (L2-L2 comparing group), L2vsL4 (L2-L4 and L4-L2), L2vsL6 (L2-L6 and L6-L2), L4vsL4 (L4-L4), L4vsL6 (L4-L6 and L6-L4), L6vsL6 (L6-L6, shared in assay 1 and assay 2), L6vsL5 (L6-L5 and L5-L6), and L5vsL5(L5-L5). The scored larva in L2vsL2, L4vsL4 and L6vsL6 was marked with dark point (indicated with red circle in the picture).

**Figure S2: Food consumption rate of *T. xiaojinensis*.** Food consumption rate of (a) L2, (b) L4 and (c) L6 *T. xiaojinensis* after 1 day, 3 days and 7 days starvation.

**Figure S3: ABS for three different aggressive behaviors.** Mean aggression behavior scores (ABS) ( $\pm$ SE) of different comparing groups with food (a) or without food (b). blue, orange, and grey bar represented “hit”, “bite” and “chase” behavior, respectively.
